# Supplementary material for: Exposure‐toxicity relationship of cabozantinib in patients with renal cell cancer and salivary gland cancer
Source: PubMed Central journal article supplement — Int J Cancer. 2021 Sep 16;150(2):308–16. doi: 10.1002/ijc.33797 (PMC9291492; doi:10.1002/ijc.33797), 2021-09-16
Supplement: IJC-150-308-s001.pdf [file IJC-150-308-s001.pdf]

## Exposure-toxicity relationship of cabozantinib in patients with renal cell cancer and salivary gland cancer

Stefanie D. Krens, Wim van Boxtel, Maïke J.M. Uijen, Frank G.A. Jansman, Ingrid M. E. Desar, Sasja F. Mulder, Carla M. L. van Herpen, Nielka P. van Erp

### Table of contents

|                                                                                                                                                                                                                           |   |
|---------------------------------------------------------------------------------------------------------------------------------------------------------------------------------------------------------------------------|---|
| <b>Supplementary Figure 1</b> Correlation between measured and calculated average cabozantinib $C_{min}$ levels for (A) the 40 mg dose level, (B) the dose level at start and (C) BTD level .....                         | 2 |
| <b>Supplementary Figure 2</b> Scatter plot of gender (A) and baseline albumin levels (B) versus calculated cabozantinib $C_{min}$ levels at 40 mg.....                                                                    | 3 |
| <b>Supplementary Figure 3</b> Scatter plot of the calculated individual cabozantinib $C_{min}$ levels at the start dose for RCC patients who did and did not receive a dose reduction relative to the starting dose ..... | 4 |
| <b>Supplementary Figure 4</b> Scatter plot of percentage weight loss from baseline versus average cabozantinib $C_{min}$ exposure .....                                                                                   | 5 |
| <b>Supplementary Figure 5</b> Kaplan-Meier curve of progression free survival for patients with advanced RCC with an exposure above and below the median average exposure of 573 $\mu\text{g/L}$ .....                    | 6 |
| <b>Supplementary Figure 6</b> Kaplan-Meier curve of progression free survival for patients with advanced RCC with an without dose reductions relative to the starting dose level .....                                    | 7 |
| <b>Supplementary Figure 7</b> Kaplan-Meier curve of overall survival for patients with advanced RCC with an exposure above and below the median average exposure of 573 $\mu\text{g/L}$ .....                             | 8 |
| <b>Supplementary Figure 8</b> Kaplan-Meier curve of overall survival for patients with advanced RCC with a 60 mg starting dose and those with a lower than 60 mg stating dose .....                                       | 9 |

**Supplementary Figure 1** Correlation between measured and calculated average cabozantinib  $C_{min}$  levels for (A) the 40 mg dose level, (B) the dose level at start and (C) BTD level

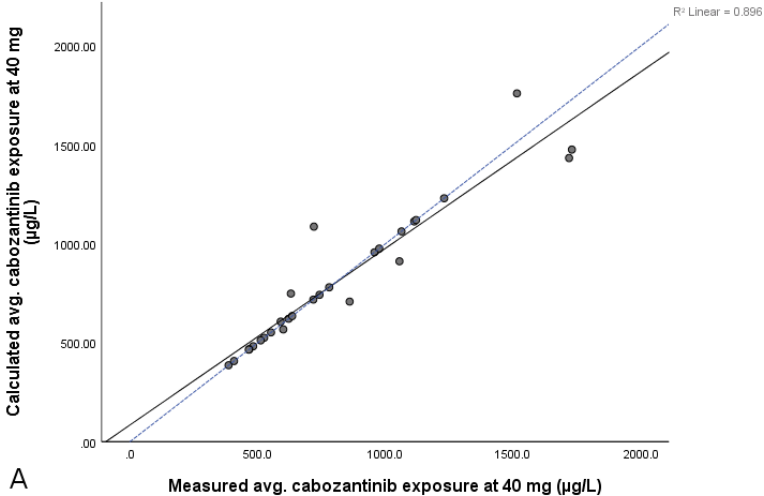

A

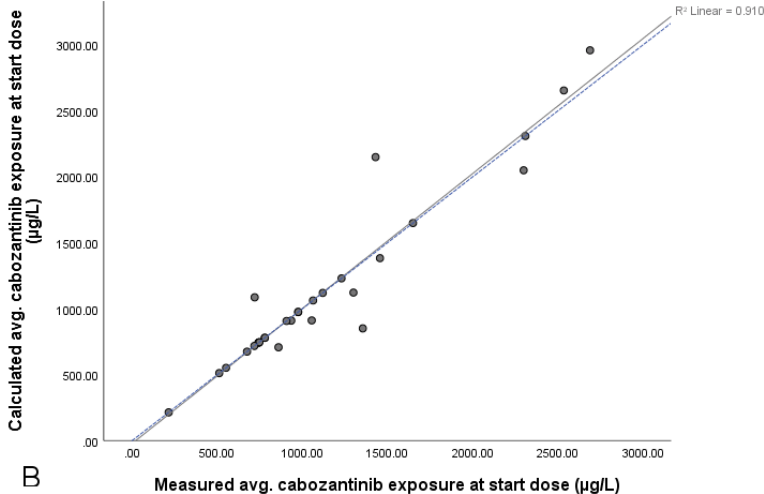

B

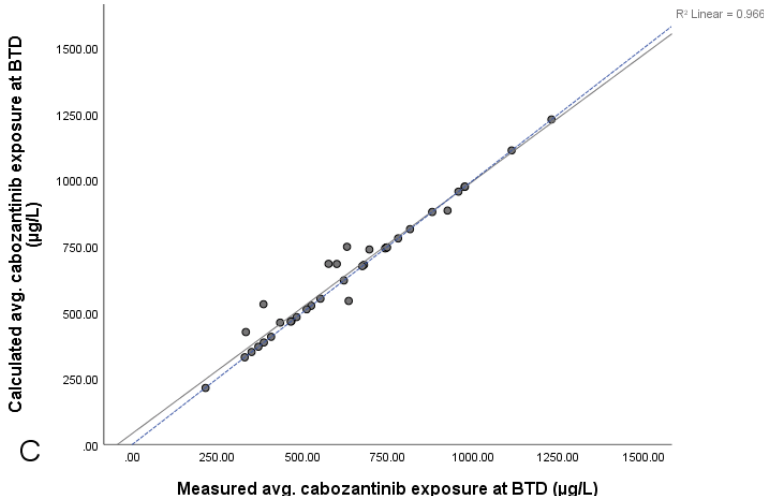

C

Blue dotted line represents reference line of  $y=x$ .

**Supplementary Figure 2** Scatter plot of gender (A) and baseline albumin levels (B) versus calculated cabozantinib  $C_{min}$  levels at 40 mg

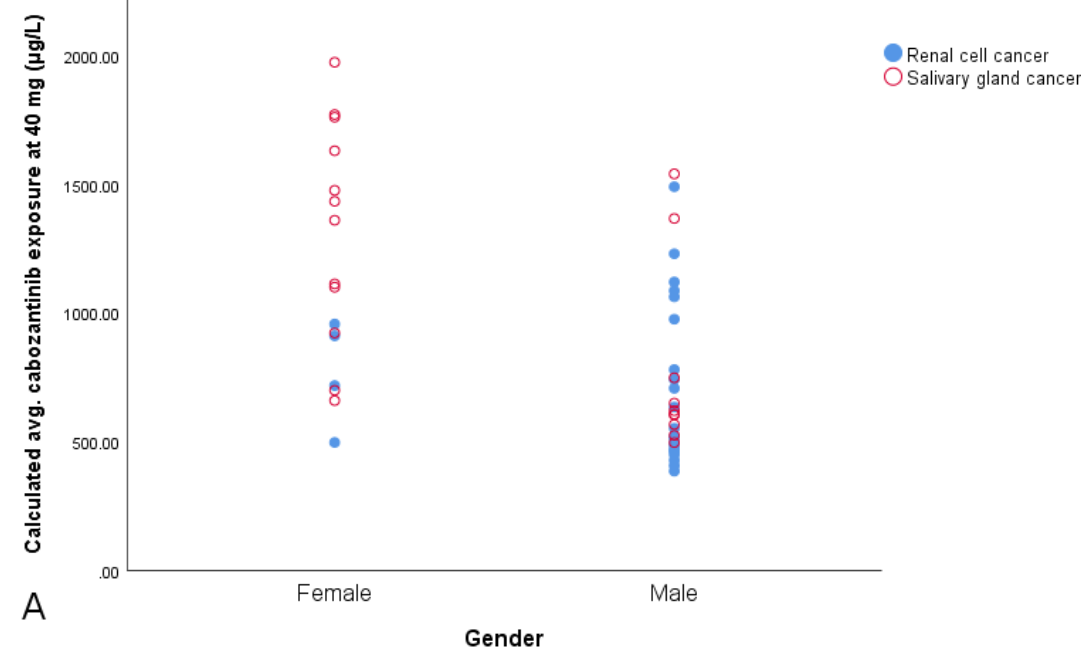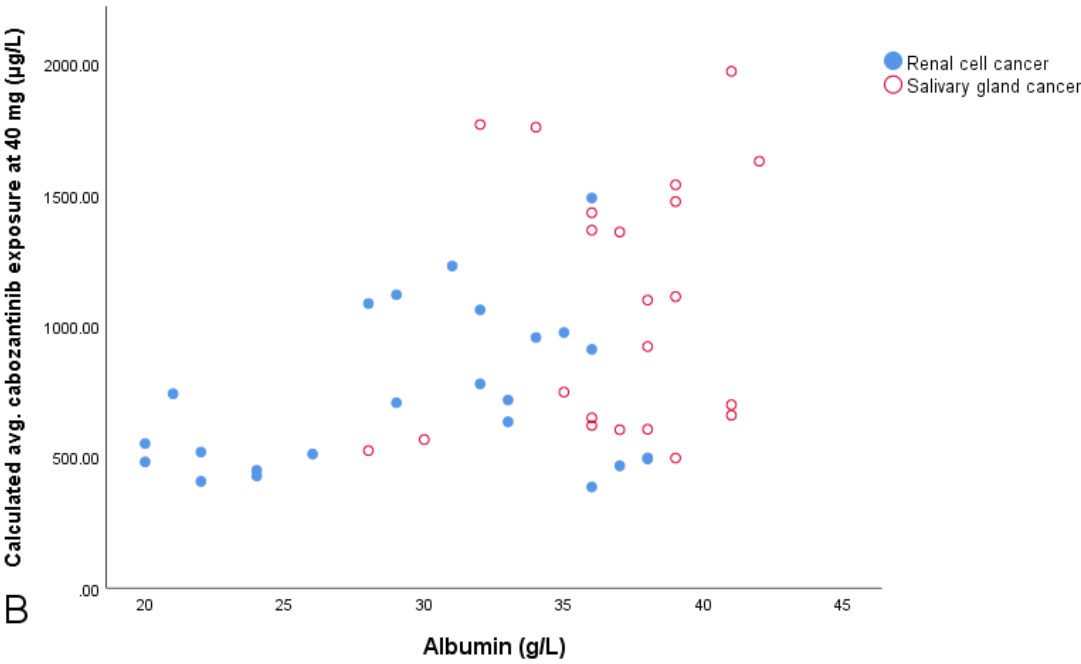

**Supplementary Figure 3** Scatter plot of the calculated individual cabozantinib  $C_{min}$  levels at the start dose for RCC patients who did and did not receive a dose reduction relative to the starting dose

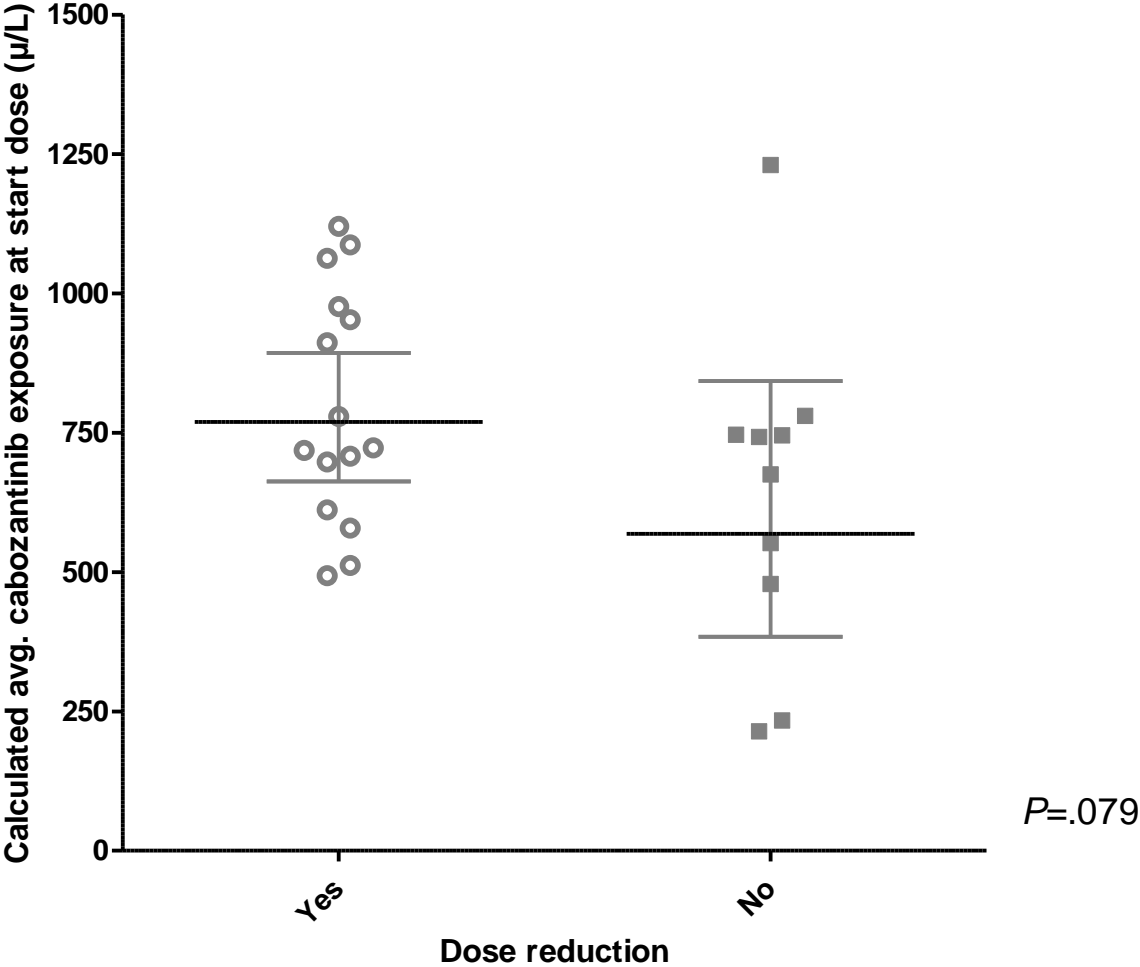

Data are presented with geometric mean and 95% CI.

**Supplementary Figure 4** Scatter plot of percentage weight loss from baseline versus average cabozantinib  $C_{min}$  exposure

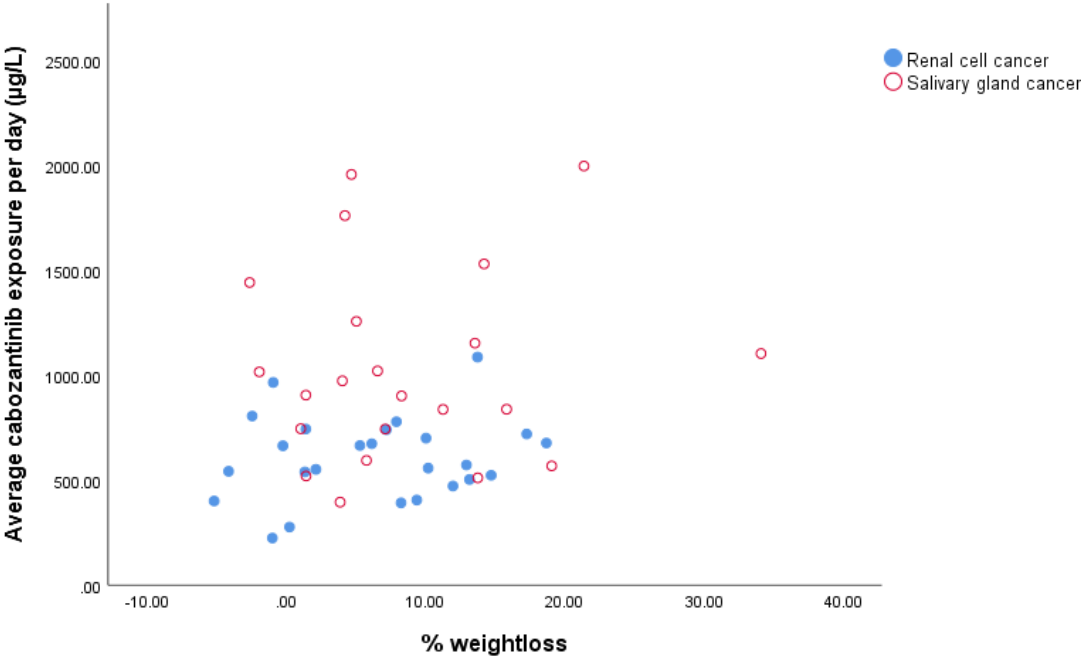

**Supplementary Figure 5** Kaplan-Meier curve of progression free survival for patients with advanced RCC with an exposure above and below the median average exposure of 573 µg/L

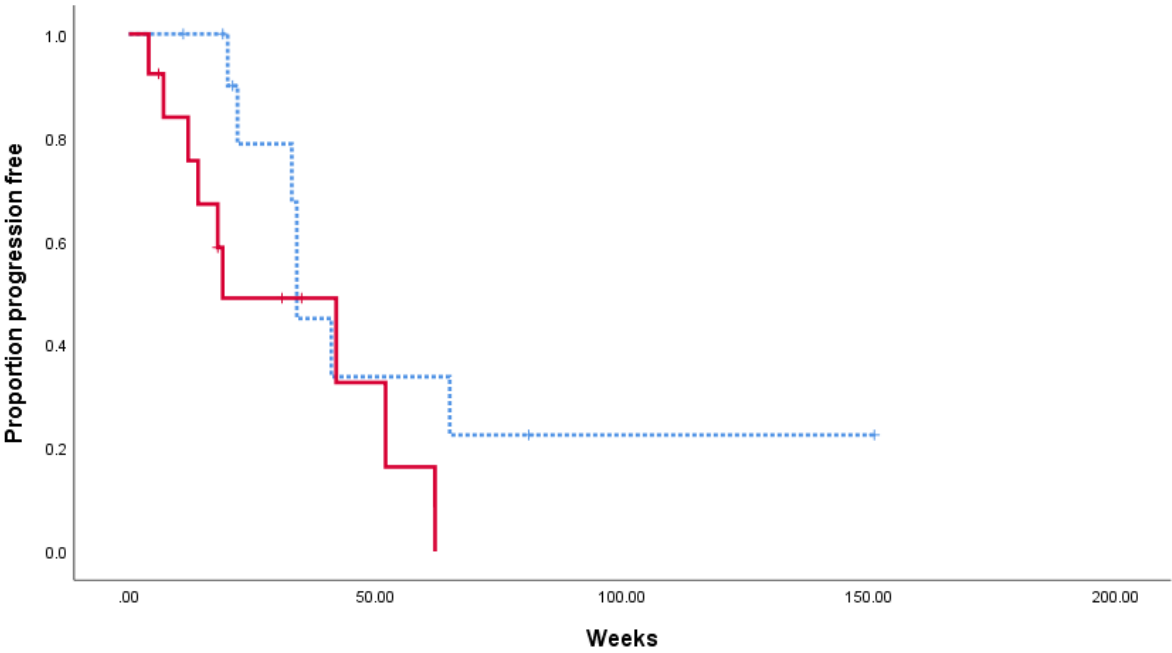

Median PFS was 19 weeks (95% CI: 0-45.7) in the group with an exposure equal or above 573 µg/L (solid red line) vs 34 weeks (95% CI 32.6-35.5) in the group with an exposure below 573 µg/L (dotted blue line) ( $P=.13$ )

| No. at risk | 0  | 25 | 50 | 75 | 100 | 125 | 150 |
|-------------|----|----|----|----|-----|-----|-----|
| ≥ 573 µg/L  | 13 | 5  | 2  | 0  | 0   | 0   | 0   |
| < 573 µg/L  | 12 | 7  | 3  | 2  | 1   | 1   | 1   |

**Supplementary Figure 6** Kaplan-Meier curve of progression free survival for patients with advanced RCC with an without dose reductions relative to the starting dose level

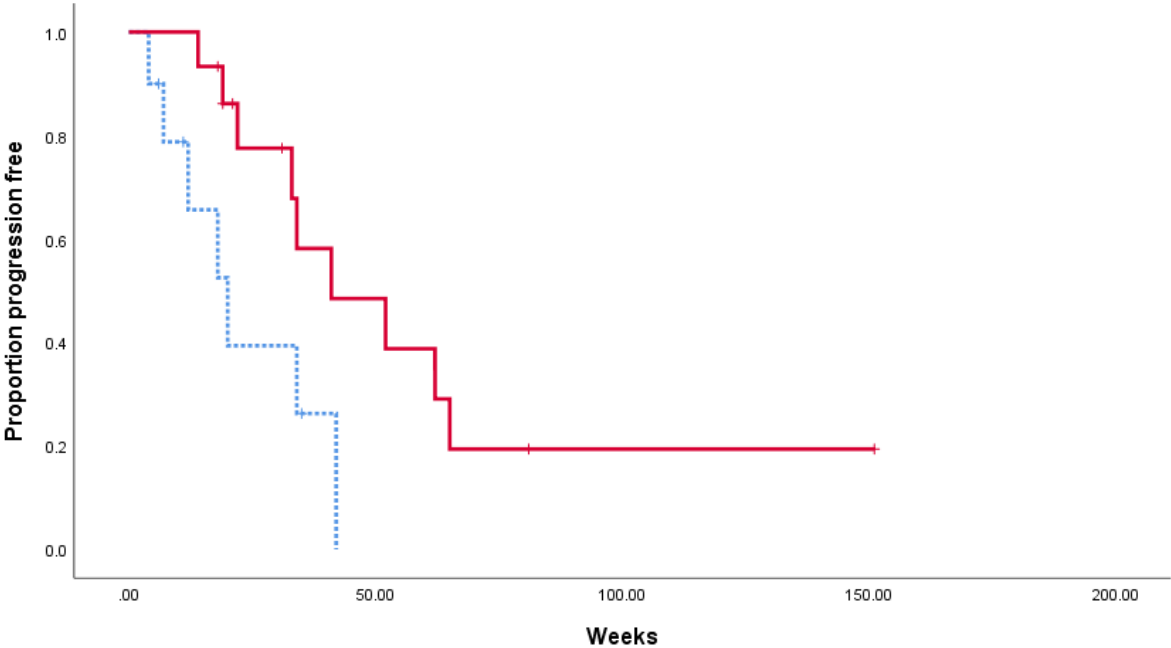

Median PFS was 41.0 (95% CI: 13.5-68.5) weeks in the group with a dose reduction (solid red line) vs 20.0 (95% CI: 9.6-30.4) weeks in the group without dose reduction (dotted blue line) ( $P=.023$ )

| No. at risk            | 0  | 25 | 50 | 75 | 100 | 125 | 150 |
|------------------------|----|----|----|----|-----|-----|-----|
| With dose reduction    | 15 | 9  | 5  | 2  | 1   | 1   | 1   |
| Without dose reduction | 10 | 3  | 0  | 0  | 0   | 0   | 0   |

**Supplementary Figure 7** Kaplan-Meier curve of overall survival for patients with advanced RCC with an exposure above and below the median average exposure of 573 µg/L

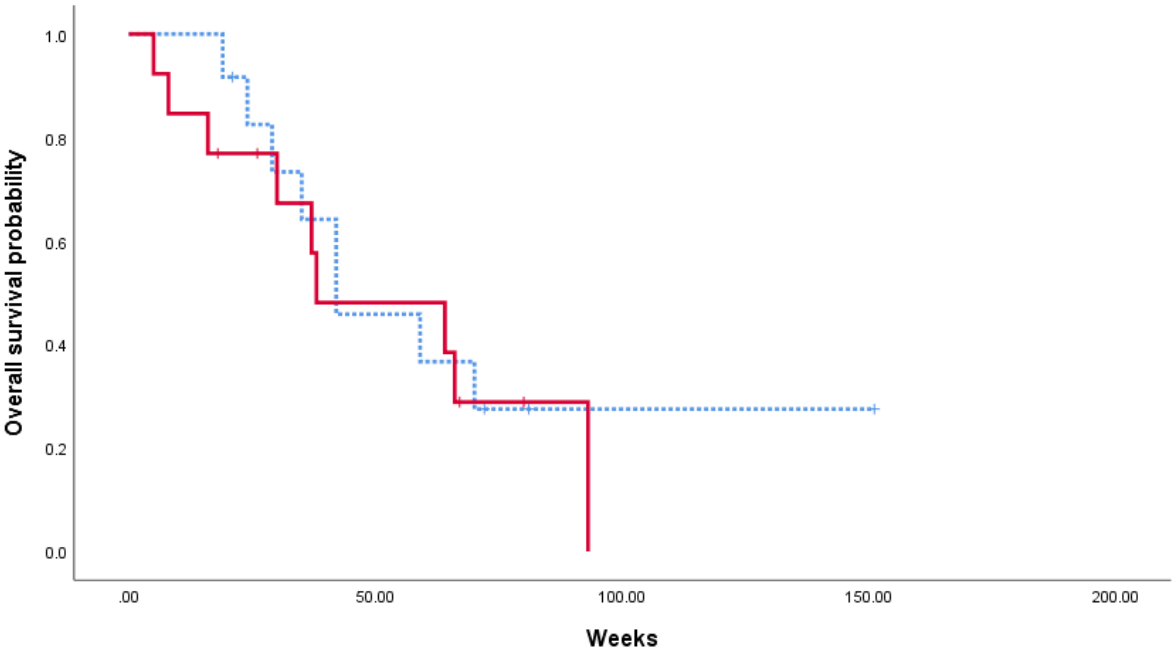

Median OS was 38 weeks (95% CI: 0-79) in the group with an exposure equal or above 573 µg/L (solid red line) vs 42 weeks (95% CI: 16-68) in the group with an exposure below 573 µg/L (dotted blue line). ( $P=.6$ )

| No. at risk | 0  | 25 | 50 | 75 | 100 | 125 | 150 |
|-------------|----|----|----|----|-----|-----|-----|
| ≥ 573 µg/L  | 13 | 9  | 5  | 2  | 0   | 0   | 0   |
| < 573 µg/L  | 12 | 9  | 5  | 2  | 1   | 1   | 1   |



**Supplementary Figure 8** Kaplan-Meier curve of overall survival for patients with advanced RCC with a 60 mg starting dose and those with a lower than 60 mg starting dose

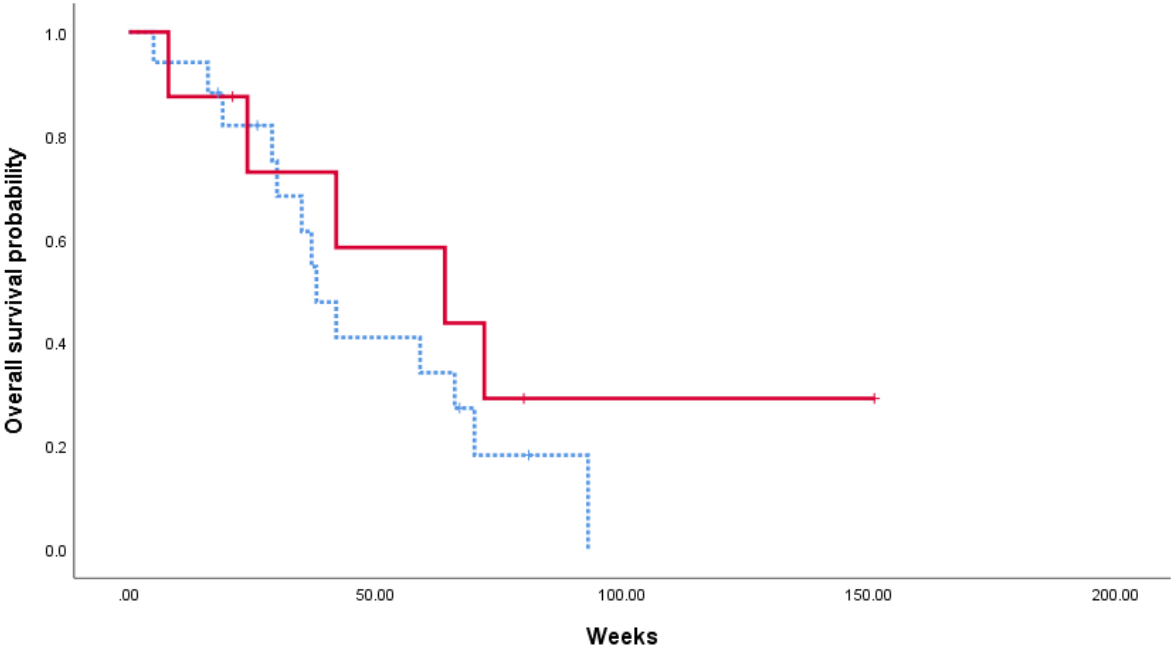

Median OS was 64 weeks (95% CI: 8-120) in the group with a start dose of 60 mg (solid red line) vs 38 weeks (95%CI: 29-47) in the group with a lower starting dose (dotted blue line). (P=.3)

| No. at risk           | 0  | 25 | 50 | 75 | 100 | 125 | 150 |
|-----------------------|----|----|----|----|-----|-----|-----|
| 60 mg starting dose   | 8  | 5  | 4  | 2  | 1   | 1   | 1   |
| < 60 mg starting dose | 17 | 13 | 6  | 2  | 0   | 0   | 0   |
